# Supplementary material for: Designed synthesis and formation mechanism of CeO2hollow nanospheres and their facile functionalization with Au nanoparticles
Source: Royal Society of Chemistry journal article supplement (doi:10.1039/c5ce00569h), 2015-01-01
Supplement: c5ce00569h1.pdf [file c5ce00569h1.pdf]

## Designed synthesis , formation mechanism of CeO<sub>2</sub> hollow nanospheres and its facile functionalization with Au nanoparticles

Wei Liu,<sup>[a]</sup> Tian Deng,<sup>[a]</sup> Lijun Feng,<sup>[a]</sup> Anran Xie,<sup>[a]</sup> Jingcai Zhang,<sup>[a]</sup> Shuping Wang,<sup>[a]</sup> Xiufang Liu,<sup>[a]</sup> Yanzhao Yang,\*<sup>[a]</sup> Jinxin Guo\*<sup>[a]</sup>

<sup>a</sup> Key Laboratory for Special Functional Aggregate Materials of Education Ministry, School of Chemistry and Chemical Engineering, Shandong University, Jinan, 250100, P. R. China. Fax: +86-531-88564464; Tel: +86-531-88362988; E-mail: yzhyang@sdu.edu.cn; jinxinguo@sdu.edu.cn.

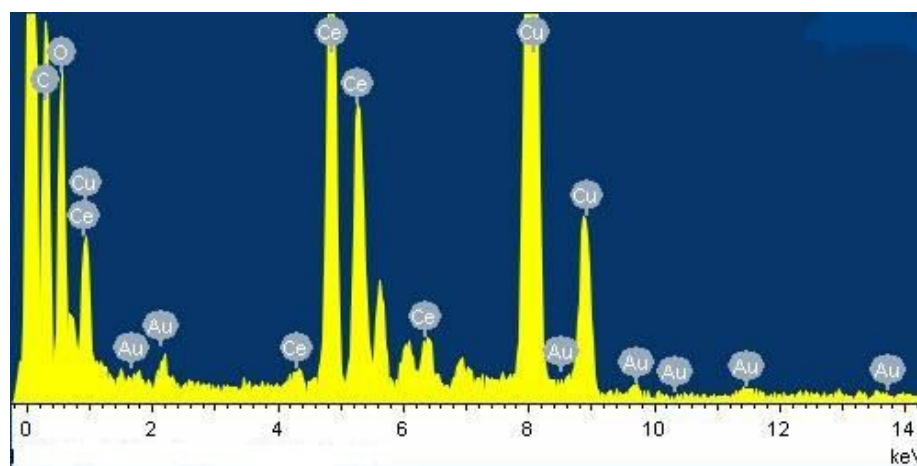

Fig. S1 EDS spectrum of the synthesized Au/CeO<sub>2</sub> nanospheres.

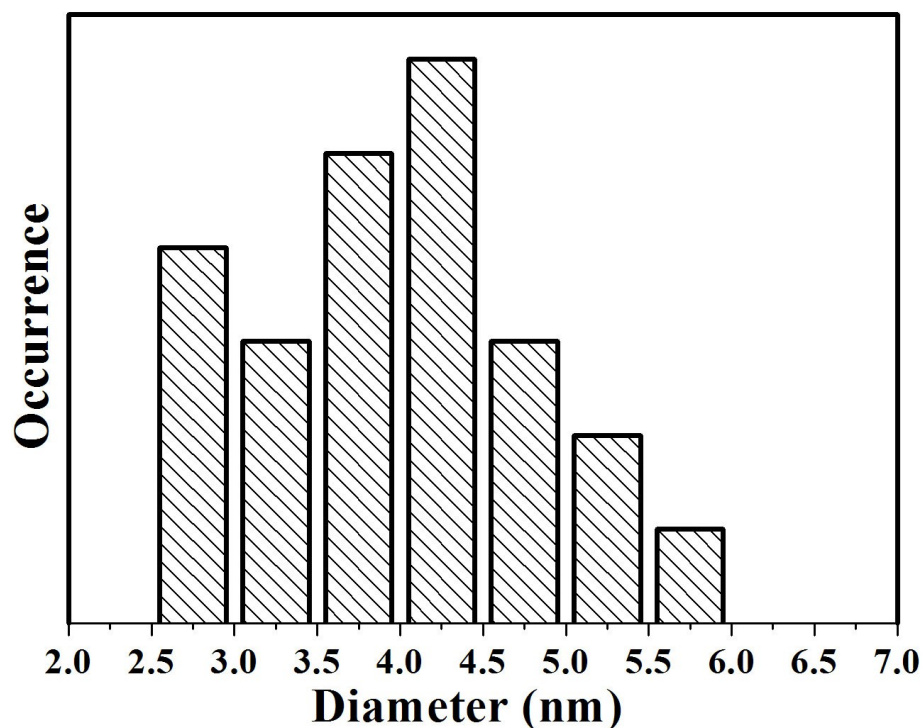

Fig. S2 The corresponding diameter distribution of the as-prepared samples: the Au NPs in the Au/CeO<sub>2</sub> spheres.

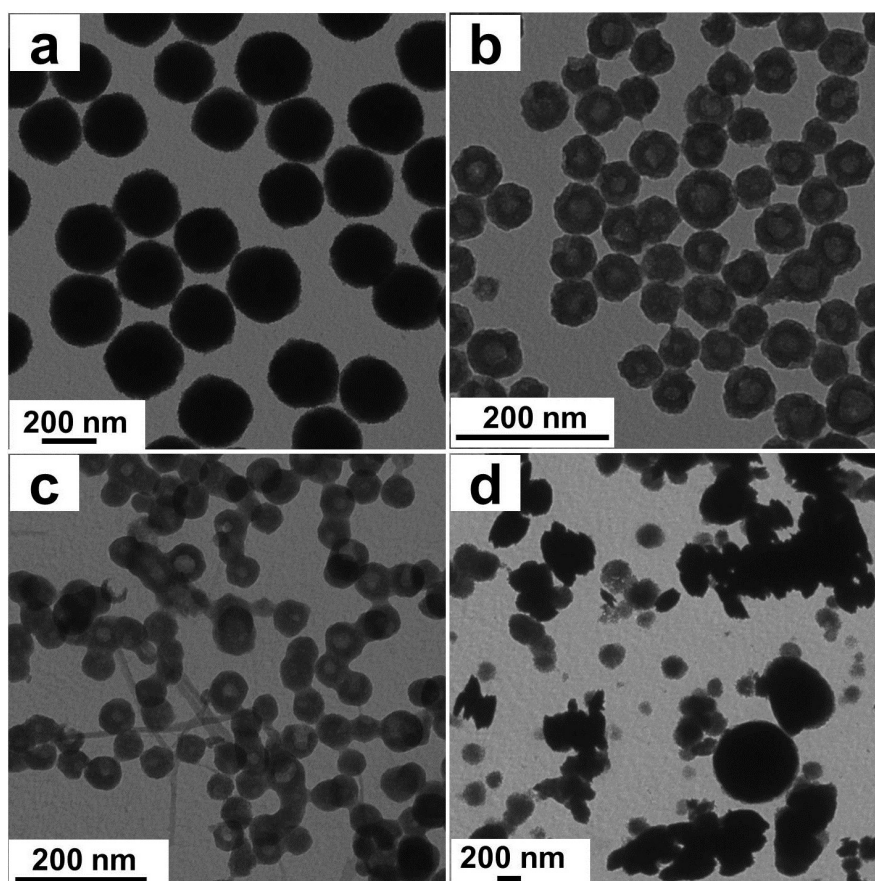

**Fig.S3** The TEM images of the products obtained at different temperature: (a) 140°C, (b) 180°C, (c) 200°C and (d) 220°C.

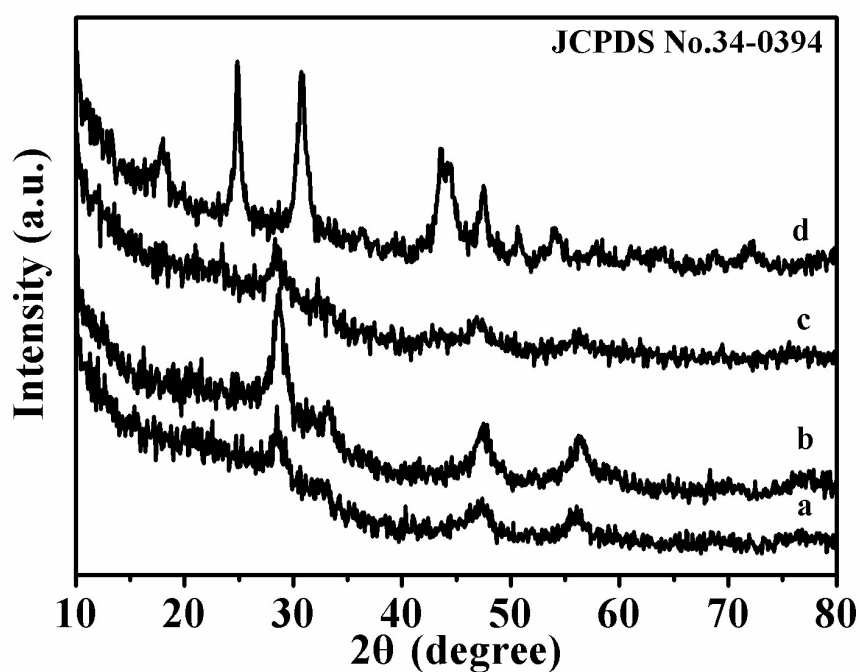

**Fig.S4** The corresponding XRD patterns of the products obtained at different temperature: (a) 140°C, (b) 180°C, (c) 200°C and (d) 220°C.

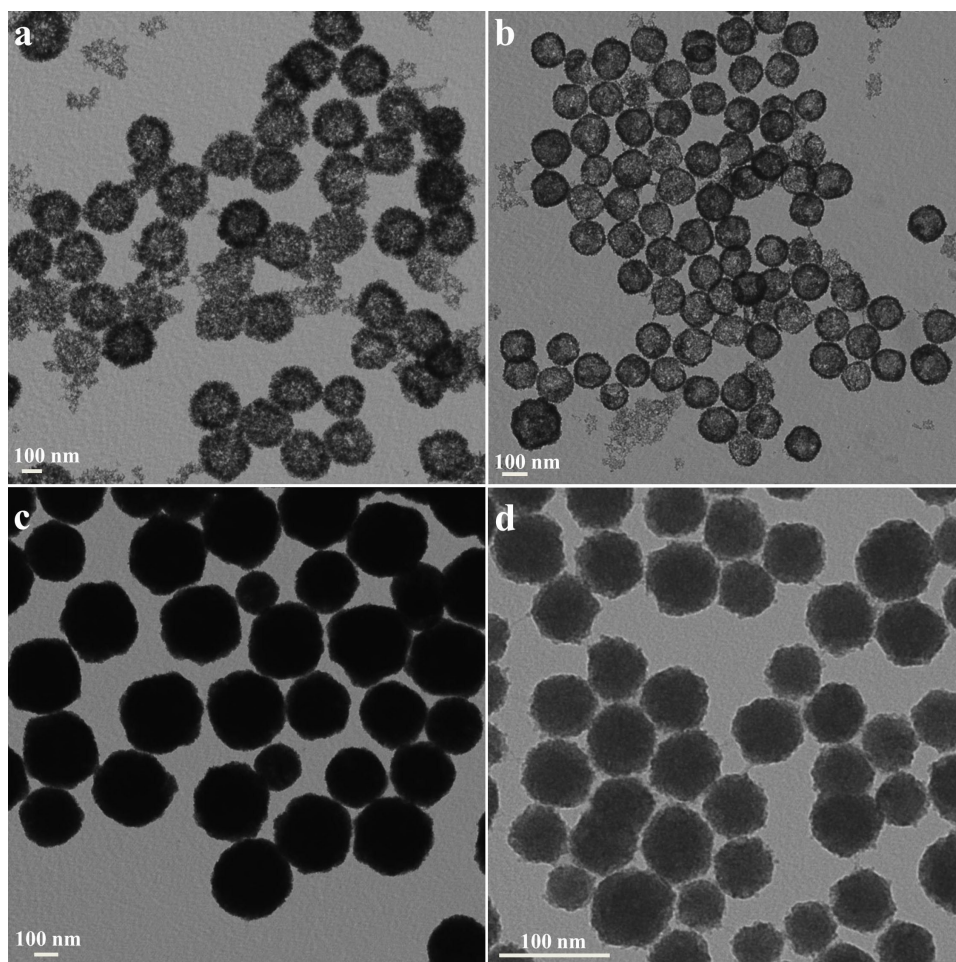

**Fig. S5** The TEM images of the as-prepared products at different conditions. The  $\text{CeO}_2$  products prepared in two-step synthesis with the etching acid: (a)  $1 \text{ mol}\cdot\text{L}^{-1}$   $\text{HCl}$ , (b)  $1 \text{ mol}\cdot\text{L}^{-1}$   $\text{HNO}_3$ . The  $\text{CeO}_2$  products prepared in one-step synthesis when the  $1 \text{ mol}\cdot\text{L}^{-1}$   $\text{HCl}$  is replaced by (c)  $1 \text{ mol}\cdot\text{L}^{-1}$   $\text{NaCl}$ , (d)  $1 \text{ mol}\cdot\text{L}^{-1}$   $\text{HNO}_3$ .

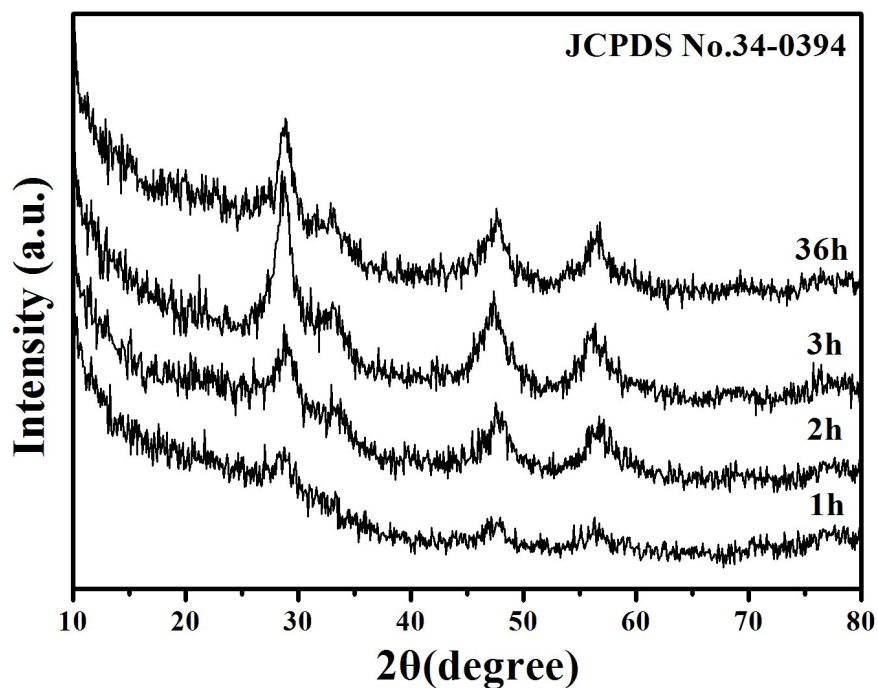

**Fig. S6** The XRD patterns of the  $\text{CeO}_2$  products obtained at different times.

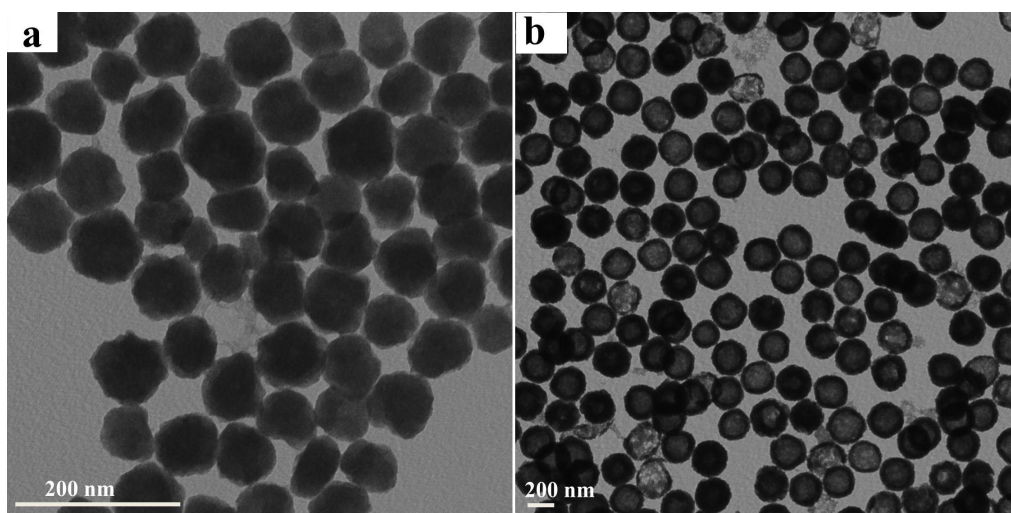

**Fig. S7** The TEM images of the different samples at 160 °C for 72h: (a) 1mL 1mol·L<sup>-1</sup> HNO<sub>3</sub>, (b) 1mL H<sub>2</sub>O.

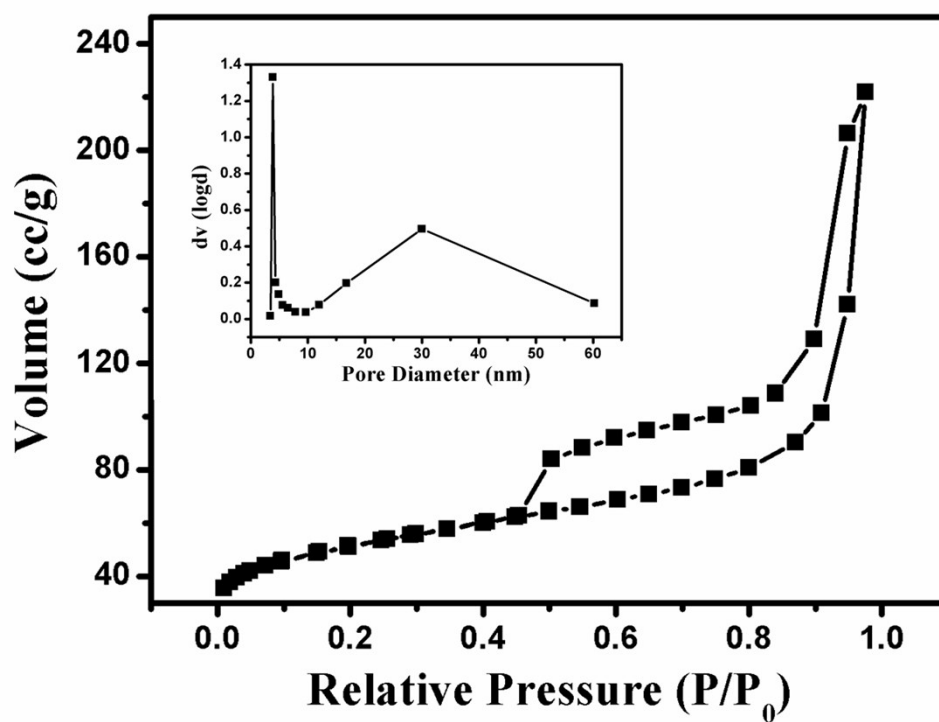

**Fig. S8** The N<sub>2</sub> adsorption-desorption isotherms of the obtained samples: pure CeO<sub>2</sub>. Inset is the corresponding BJH pore size distribution curves.

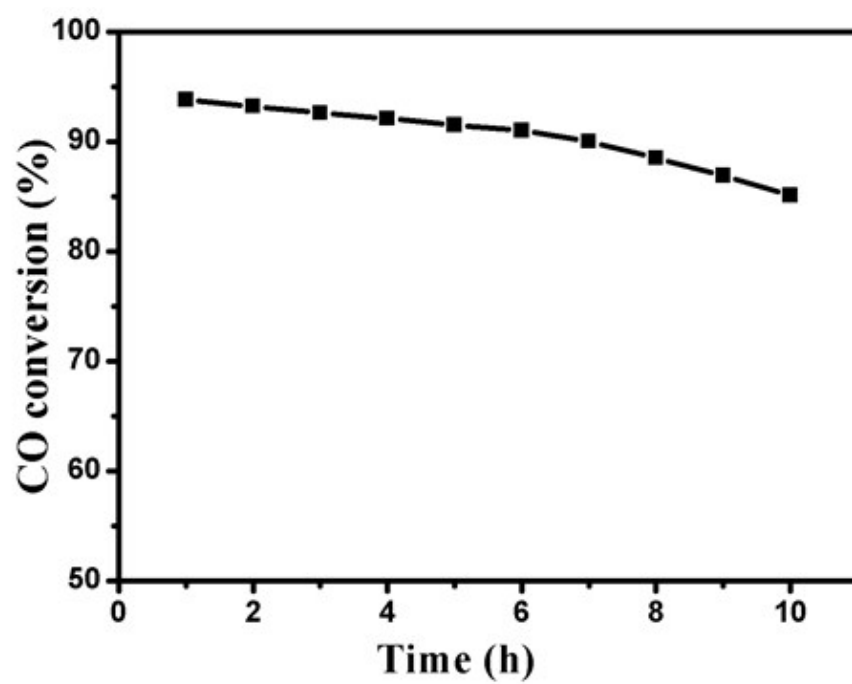

**Fig. S9** The CO conversion stability tests of the supported Au/CeO<sub>2</sub> catalysts at 160°C for 10h.
